# Supplementary material for: Mechanism of synergistic activation of Arp2/3 complex by cortactin and WASP-family proteins
Source: PubMed Central journal article supplement (PMC10613254; doi:10.1038/s41467-023-42229-y), 2023-10-28
Supplement: 41467_2023_42229_MOESM3_ESM.pdf [file 41467_2023_42229_MOESM3_ESM.pdf]

## Description of Additional Supplementary Files

**File Name:** Supplementary Movie 1

**Description:** Full rotation of the cryo-EM map of Cort<sub>1-76</sub> (orange) bound to Arp2/3 complex. Arp2/3 complex subunits are colored as follows: Arp2, cyan; Arp3, green; ArpC1, yellow; ArpC2, ArpC3, and ArpC5, light gray; ArpC4, dark gray (see also **Fig. 1b** in the main text).
